# Supplementary material for: Fabrication of mechanically improved hydrogels using a movable cross-linker based on vinyl modified polyrotaxane
Source: Royal Society of Chemistry journal article supplement (doi:10.1039/b810290b), 2008-01-01
Supplement: b810290b.pdf [file b810290b.pdf]

# Fabrication of Mechanically Improved Hydrogels Using A Movable Cross-linker Based on Vinyl Modified Polyrotaxane

*Abu Bin Imran*<sup>‡</sup>, *Yukikazu Takeoka*<sup>\*,‡,†</sup>, *Takahiro Seki*<sup>‡,†</sup>, *Toshiyuki Kataoka*<sup>§</sup>,

*Masatoshi Kidowaki*<sup>§,†</sup> and *Kohzo Ito*<sup>§,†</sup>

<sup>‡</sup>Department of Molecular Design and Engineering, Graduate School of Engineering,

Nagoya University, Furo-cho, Chikusa-ku, Nagoya, 464-8603, Japan

<sup>§</sup>Department of Advanced Materials Science, Graduate School of Frontier Sciences,

The University of Tokyo, 5-1-5 Kashiwanoha, Kashiwa, Chiba 277-8561, Japan

<sup>†</sup>CREST, Japan Science and Technology Agency (JST), 4-1-8 Honcho,

Kawaguchi, Saitama 332-0012, Japan

## Supporting Information

## Experimental

$^1\text{H}$  NMR spectra were carried out with 400MHz NMR A-400 (JEOL) spectrometer. Tetramethylsilane (TMS) was used as an internal standard for the analysis of chemical shifts. Fourier transform infrared spectroscopy spectra were observed by Bio Rad FTS 6000 spectrometer.

The static degree of swelling for every gel sample was measured by inverted microscope. The cylindrical gel having diameter of about 270  $\mu\text{m}$  as prepared state was used for each measurements. The equilibrium degrees of swelling,  $d/d_0$ , ( $d$  = the equilibrium state of a gel at certain condition and  $d_0$  = the gel at preparative state or the diameter of the cylinder) were observed against the change of temperatures.

**Table S1.** Sample codes of TN gels

| Sample codes (TN gel) | NIPA Monomer (M) | BIS (mM) | AIBN (mM) | [NIPA]/[BIS] | Solvent |
|-----------------------|------------------|----------|-----------|--------------|---------|
| TN <sub>1</sub>       | 2                | 100.0    | 8.13      | 20           | DMSO    |
| TN <sub>2</sub>       | 2                | 66.7     | 8.13      | 30           | DMSO    |
| TN <sub>3</sub>       | 2                | 33.4     | 8.13      | 60           | DMSO    |
| TN <sub>4</sub>       | 2                | 20.0     | 8.13      | 100          | DMSO    |

**Table S2.** Sample codes of RN gels

| Sample codes (RN gel) | NIPA Monomer (M) | MPR (wt%) | AIBN (mM) | Solvent |
|-----------------------|------------------|-----------|-----------|---------|
| RN <sub>1</sub>       | 2                | 4.0       | 8.13      | DMSO    |
| RN <sub>2</sub>       | 2                | 2.7       | 8.13      | DMSO    |
| RN <sub>3</sub>       | 2                | 1.4       | 8.13      | DMSO    |
| RN <sub>4</sub>       | 2                | 0.8       | 8.13      | DMSO    |

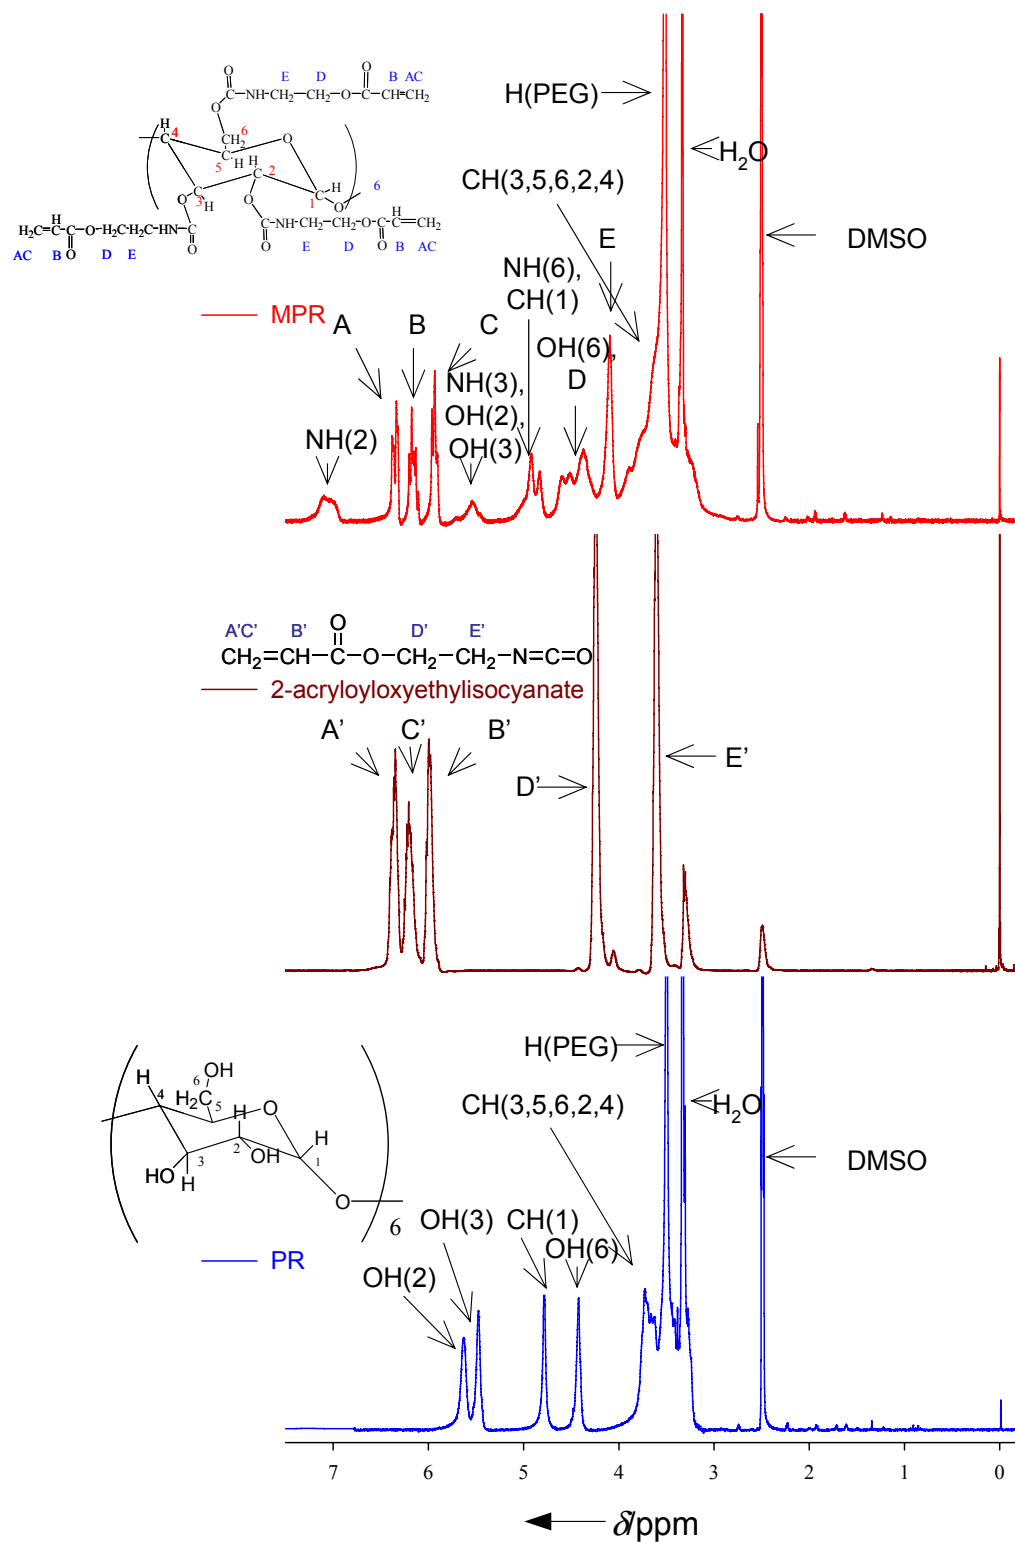

**Figure S1.**  $^1\text{H-NMR}$  spectra of PR, 2-acryloyloxyethyl isocyanate and MPR in  $\text{DMSO-d}_6$  with 1% TMS. All of the characteristics peaks of PR and MPR come from the  $\alpha$ -cyclodextrin and modified  $\alpha$ -cyclodextrin group. (The number inside the parentheses depicts the carbon position of 1,4 linked  $\alpha$ -D-glucopyranoside unit of  $\alpha$ -cyclodextrin).

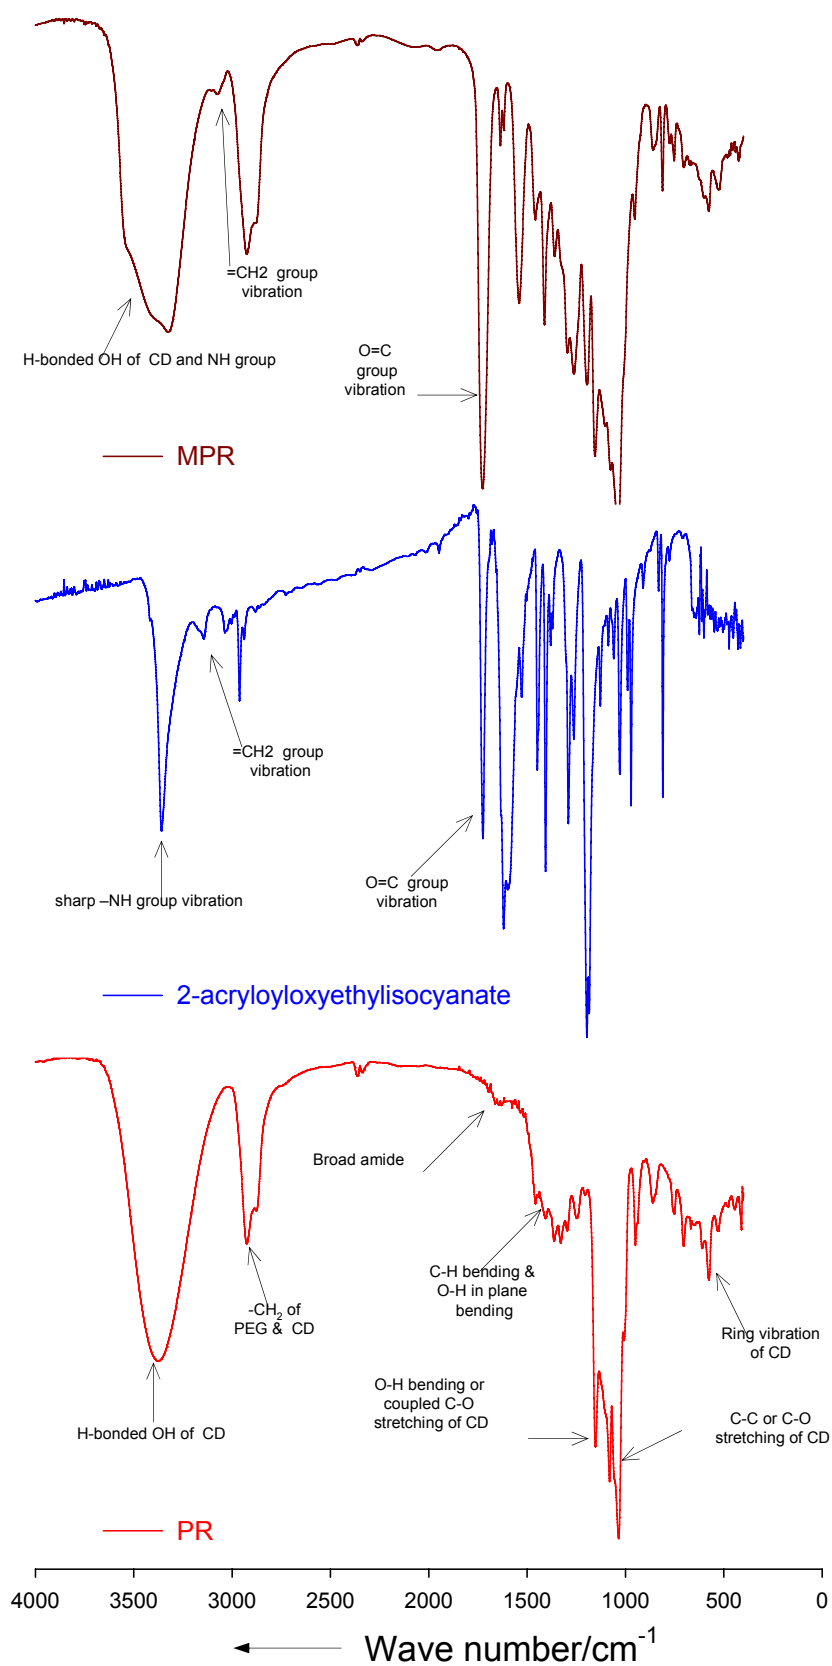

**Figure S2.** FT-IR spectra of PR, 2-acryloyloxyethyl isocyanate and MPR.
